# Supplementary material
Source: PubMed Central journal article supplement (PMC2733778)
Supplement: cwn102_1.pdf [file cwn102_1.pdf]

## Supplemental Figure Legends

**Fig. S1.** Prediction of *Mtb* SodC intrinsically folded regions by FoldIndex©.

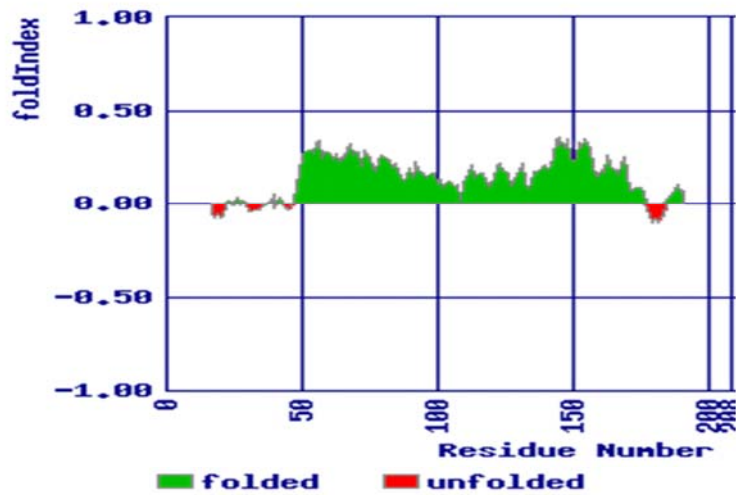

1 **CSSPQHASTV** **PGTTPSIW**TG**** **SPAPSGLS**GH**** **DEES**PG**AQSL** **TSTLTAPD**GT****  
 51 **KVATA**KFE**F**A**** **NGYATV**TI**A**T**** **TGV**GK**LTP**GF**** **HGLH**IQ**V**GK**** **CEPNSV**AP**T**G****  
 101 **GAPGN**FL**S**AG**** **GHYH**VP**G**HT**G** **TPAS**GD**L**AS**L** **QVR**GD**S**AML**** **VTTT**DA**F**TMD****  
 151 **DLLS**GAK**T**AI**** **IIHAG**AD**N**F**A** **NIP**PER**Y**VQ**V** **NGTP**GP**DE**TT**** **LTT**GD**A**GK**R**V****  
 201 **ACGV**IG**S**G****

( Red denotes the predicted disordered segment )

Table S1: rSodC peptide mapping

| Trypsin |                      |                     |                 |                                    |                     |                   |                         |               |         | Precursor Mass (m/z) | Spectrum charge | Actual peptide mass (AMU) | Actual minus calculated peptide mass (AMU) | Peptide start index | Peptide stop index |
|---------|----------------------|---------------------|-----------------|------------------------------------|---------------------|-------------------|-------------------------|---------------|---------|----------------------|-----------------|---------------------------|--------------------------------------------|---------------------|--------------------|
| Peptide | Sequence             | Previous amino acid | Next amino acid | Peptide identification probability | SEQUEST XCorr score | SEQUEST DcN score | X! Tandem -log(e) score | Modifications |         |                      |                 |                           |                                            |                     |                    |
| Try1    | DEESFGAQLSTSLTAPDGTK | H                   | V               | 95.00%                             | 5.55                | 0                 | 0                       |               | 1053.86 | 2                    | 2105.71         | 1.7                       | 23                                         | 43                  |                    |
| Try1    | DEESFGAQLSTSLTAPDGTK | H                   | V               | 95.00%                             | 5.07                | 0                 | 0                       |               | 1053.85 | 2                    | 2105.68         | 1.7                       | 23                                         | 43                  |                    |
| Try1    | DEESFGAQLSTSLTAPDGTK | H                   | V               | 95.00%                             | 4.86                | 0                 | 0                       |               | 1053.42 | 2                    | 2104.82         | 0.84                      | 23                                         | 43                  |                    |
| Try2    | TSLTAPDGTK           | L                   | V               | 95.00%                             | 2.45                | 0                 | 0                       |               | 1092.74 | 1                    | 1091.73         | 1.2                       | 33                                         | 43                  |                    |
| Try2    | TSLTAPDGTK           | L                   | V               | 95.00%                             | 2.35                | 0                 | 0                       |               | 1092.39 | 1                    | 1091.38         | 0.83                      | 33                                         | 43                  |                    |
| Try2    | TSLTAPDGTK           | L                   | V               | 95.00%                             | 2.13                | 0                 | 0                       |               | 1091.69 | 1                    | 1090.68         | 0.13                      | 33                                         | 43                  |                    |
| Try2    | TSLTAPDGTK           | L                   | V               | 95.00%                             | 2.27                | 0                 | 0                       |               | 1091.68 | 1                    | 1090.67         | 0.12                      | 33                                         | 43                  |                    |
| Try2    | TSLTAPDGTK           | L                   | V               | 95.00%                             | 2.67                | 0                 | 0                       |               | 547.23  | 2                    | 1092.44         | 1.9                       | 33                                         | 43                  |                    |
| Try2    | TSLTAPDGTK           | L                   | V               | 95.00%                             | 2.16                | 0.915             | 0                       |               | 546.76  | 2                    | 1091.5          | 0.95                      | 33                                         | 43                  |                    |
| Try2    | TSLTAPDGTK           | L                   | V               | 95.00%                             | 2.3                 | 0.904             | 0                       |               | 546.74  | 2                    | 1091.46         | 0.91                      | 33                                         | 43                  |                    |
| Try3    | VATAK                | K                   | F               | 95.00%                             | 2.3                 | 0                 | 0.602                   |               | 490.66  | 1                    | 489.65          | 1.4                       | 44                                         | 48                  |                    |
| Try3    | VATAK                | K                   | F               | 95.00%                             | 1.91                | 0                 | 0.602                   |               | 490.54  | 1                    | 489.53          | 1.2                       | 44                                         | 48                  |                    |
| Try3    | VATAK                | K                   | F               | 95.00%                             | 1.98                | 0                 | 0.678                   |               | 490.35  | 1                    | 489.34          | 1.1                       | 44                                         | 48                  |                    |
| Try3    | VATAK                | K                   | F               | 95.00%                             | 1.94                | 0                 | 0.658                   |               | 489.96  | 1                    | 488.95          | 0.66                      | 44                                         | 48                  |                    |
| Try3    | VATAK                | K                   | F               | 95.00%                             | 1.67                | 0                 | 0.62                    |               | 489.91  | 1                    | 488.9           | 0.61                      | 44                                         | 48                  |                    |
| Try3    | VATAK                | K                   | F               | 95.00%                             | 2                   | 0                 | 0.678                   |               | 489.66  | 1                    | 488.65          | 0.36                      | 44                                         | 48                  |                    |
| Try3    | VATAK                | K                   | F               | 95.00%                             | 1.87                | 0                 | 0.678                   |               | 489.61  | 1                    | 488.6           | 0.31                      | 44                                         | 48                  |                    |
| Try3    | VATAK                | K                   | F               | 95.00%                             | 1.75                | 0                 | 0.585                   |               | 489.6   | 1                    | 488.59          | 0.3                       | 44                                         | 48                  |                    |
| Try3    | VATAK                | K                   | F               | 95.00%                             | 1.7                 | 0                 | 0.602                   |               | 489.58  | 1                    | 488.57          | 0.28                      | 44                                         | 48                  |                    |
| Try3    | VATAK                | K                   | F               | 95.00%                             | 1.98                | 0                 | 0.638                   |               | 489.57  | 1                    | 488.56          | 0.27                      | 44                                         | 48                  |                    |
| Try3    | VATAK                | K                   | F               | 95.00%                             | 1.54                | 0                 | 0.62                    |               | 489.56  | 1                    | 488.55          | 0.26                      | 44                                         | 48                  |                    |
| Try3    | VATAK                | K                   | F               | 95.00%                             | 2.03                | 0                 | 0.678                   |               | 489.54  | 1                    | 488.53          | 0.24                      | 44                                         | 48                  |                    |
| Try3    | VATAK                | K                   | F               | 95.00%                             | 1.86                | 0                 | 0.638                   |               | 489.53  | 1                    | 488.52          | 0.23                      | 44                                         | 48                  |                    |
| Try3    | VATAK                | K                   | F               | 95.00%                             | 1.49                | 0                 | 0.62                    |               | 489.51  | 1                    | 488.5           | 0.21                      | 44                                         | 48                  |                    |
| Try3    | VATAK                | K                   | F               | 95.00%                             | 1.46                | 0                 | 0.658                   |               | 489.5   | 1                    | 488.49          | 0.2                       | 44                                         | 48                  |                    |
| Try3    | VATAK                | K                   | F               | 95.00%                             | 1.37                | 0                 | 0.602                   |               | 489.48  | 1                    | 488.47          | 0.18                      | 44                                         | 48                  |                    |
| Try3    | VATAK                | K                   | F               | 95.00%                             | 1.77                | 0                 | 0.699                   |               | 489.47  | 1                    | 488.46          | 0.17                      | 44                                         | 48                  |                    |
| Try3    | VATAK                | K                   | F               | 95.00%                             | 1.82                | 0                 | 0.678                   |               | 489.47  | 1                    | 488.46          | 0.17                      | 44                                         | 48                  |                    |
| Try3    | VATAK                | K                   | F               | 95.00%                             | 1.93                | 0                 | 0.678                   |               | 489.46  | 1                    | 488.46          | 0.17                      | 44                                         | 48                  |                    |
| Try3    | VATAK                | K                   | F               | 95.00%                             | 1.89                | 0                 | 0.658                   |               | 489.46  | 1                    | 488.45          | 0.16                      | 44                                         | 48                  |                    |
| Try3    | VATAK                | K                   | F               | 95.00%                             | 1.79                | 0                 | 0.658                   |               | 489.45  | 1                    | 488.44          | 0.15                      | 44                                         | 48                  |                    |
| Try3    | VATAK                | K                   | F               | 95.00%                             | 1.74                | 0                 | 0.678                   |               | 489.41  | 1                    | 488.4           | 0.14                      | 44                                         | 48                  |                    |
| Try3    | VATAK                | K                   | F               | 95.00%                             | 1.51                | 0                 | 0.658                   |               | 489.17  | 1                    | 488.16          | -0.13                     | 44                                         | 48                  |                    |
| Try3    | VATAK                | K                   | F               | 95.00%                             | 1.51                | 0                 | 0.638                   |               | 488.87  | 1                    | 487.86          | -0.43                     | 44                                         | 48                  |                    |
| Try4    | FEFANGYATVHIATTGVK   | K                   | L               | 95.00%                             | 3.44                | 0                 | 6.85                    |               | 1950.04 | 1                    | 1949.03         | 3.1                       | 49                                         | 67                  |                    |
| Try4    | FEFANGYATVHIATTGVK   | K                   | L               | 95.00%                             | 2.97                | 0                 | 4.04                    |               | 1949.14 | 1                    | 1948.13         | 2.1                       | 49                                         | 67                  |                    |
| Try4    | FEFANGYATVHIATTGVK   | K                   | L               | 95.00%                             | 2.94                | 0                 | 4.27                    |               | 1949.08 | 1                    | 1948.07         | 2.1                       | 49                                         | 67                  |                    |
| Try4    | FEFANGYATVHIATTGVK   | K                   | L               | 95.00%                             | 2.81                | 0                 | 4.11                    |               | 1949.09 | 1                    | 1948.08         | 2.1                       | 49                                         | 67                  |                    |
| Try4    | FEFANGYATVHIATTGVK   | K                   | L               | 95.00%                             | 3.13                | 0                 | 5.55                    |               | 1949.08 | 1                    | 1948.07         | 2.1                       | 49                                         | 67                  |                    |
| Try4    | FEFANGYATVHIATTGVK   | K                   | L               | 95.00%                             | 2.65                | 0                 | 4.72                    |               | 1949.05 | 1                    | 1948.04         | 2.1                       | 49                                         | 67                  |                    |
| Try4    | FEFANGYATVHIATTGVK   | K                   | L               | 95.00%                             | 2.49                | 0                 | 3.96                    |               | 1949.05 | 1                    | 1948.04         | 2.1                       | 49                                         | 67                  |                    |
| Try4    | FEFANGYATVHIATTGVK   | K                   | L               | 95.00%                             | 2.57                | 0                 | 3.16                    |               | 1949.04 | 1                    | 1948.03         | 2.1                       | 49                                         | 67                  |                    |
| Try4    | FEFANGYATVHIATTGVK   | K                   | L               | 95.00%                             | 2.47                | 0                 | 5.38                    |               | 1948.6  | 1                    | 1947.59         | 1.6                       | 49                                         | 67                  |                    |
| Try4    | FEFANGYATVHIATTGVK   | K                   | L               | 95.00%                             | 2.86                | 0                 | 4.8                     |               | 1948.23 | 1                    | 1947.22         | 1.2                       | 49                                         | 67                  |                    |
| Try4    | FEFANGYATVHIATTGVK   | K                   | L               | 95.00%                             | 3.01                | 0                 | 5.11                    |               | 1948.1  | 1                    | 1947.09         | 1.1                       | 49                                         | 67                  |                    |
| Try4    | FEFANGYATVHIATTGVK   | K                   | L               | 95.00%                             | 2.06                | 0                 | 1.39                    |               | 1948.03 | 1                    | 1947.02         | 1                         | 49                                         | 67                  |                    |
| Try4    | FEFANGYATVHIATTGVK   | K                   | L               | 95.00%                             | 2.81                | 0                 | 6.34                    |               | 1947.99 | 1                    | 1946.98         | 1                         | 49                                         | 67                  |                    |
| Try4    | FEFANGYATVHIATTGVK   | K                   | L               | 95.00%                             | 0                   | 0                 | 6.36                    |               | 976.25  | 2                    | 1950.48         | 4.5                       | 49                                         | 67                  |                    |
| Try4    | FEFANGYATVHIATTGVK   | K                   | L               | 95.00%                             | 0                   | 0                 | 6.35                    |               | 976.25  | 2                    | 1950.48         | 4.5                       | 49                                         | 67                  |                    |
| Try4    | FEFANGYATVHIATTGVK   | K                   | L               | 95.00%                             | 0                   | 0                 | 6.35                    |               | 976.22  | 2                    | 1950.43         | 4.5                       | 49                                         | 67                  |                    |
| Try4    | FEFANGYATVHIATTGVK   | K                   | L               | 95.00%                             | 0                   | 0                 | 6.92                    |               | 976.21  | 2                    | 1950.41         | 4.4                       | 49                                         | 67                  |                    |
| Try4    | FEFANGYATVHIATTGVK   | K                   | L               | 95.00%                             | 0                   | 0                 | 6.35                    |               | 976.2   | 2                    | 1950.38         | 4.4                       | 49                                         | 67                  |                    |
| Try4    | FEFANGYATVHIATTGVK   | K                   | L               | 95.00%                             | 0                   | 0                 | 6.92                    |               | 976.19  | 2                    | 1950.37         | 4.4                       | 49                                         | 67                  |                    |
| Try4    | FEFANGYATVHIATTGVK   | K                   | L               | 95.00%                             | 0                   | 0                 | 6.92                    |               | 976.18  | 2                    | 1950.34         | 4.4                       | 49                                         | 67                  |                    |
| Try4    | FEFANGYATVHIATTGVK   | K                   | L               | 95.00%                             | 0                   | 0                 | 6.92                    |               | 976.18  | 2                    | 1950.34         | 4.4                       | 49                                         | 67                  |                    |
| Try4    | FEFANGYATVHIATTGVK   | K                   | L               | 95.00%                             | 0                   | 0                 | 6.4                     |               | 976.17  | 2                    | 1950.32         | 4.3                       | 49                                         | 67                  |                    |
| Try4    | FEFANGYATVHIATTGVK   | K                   | L               | 95.00%                             | 0                   | 0                 | 8.89                    |               | 976.1   | 2                    | 1950.18         | 4.2                       | 49                                         | 67                  |                    |
| Try4    | FEFANGYATVHIATTGVK   | K                   | L               | 95.00%                             | 0                   | 0                 | 7.14                    |               | 976.09  | 2                    | 1950.17         | 4.2                       | 49                                         | 67                  |                    |
| Try4    | FEFANGYATVHIATTGVK   | K                   | L               | 95.00%                             | 0                   | 0                 | 8.89                    |               | 976.08  | 2                    | 1950.14         | 4.2                       | 49                                         | 67                  |                    |
| Try4    | FEFANGYATVHIATTGVK   | K                   | L               | 95.00%                             | 0                   | 0                 | 12                      |               | 976.07  | 2                    | 1950.12         | 4.1                       | 49                                         | 67                  |                    |
| Try4    | FEFANGYATVHIATTGVK   | K                   | L               | 95.00%                             | 0                   | 0                 | 8.19                    |               | 976.04  | 2                    | 1950.07         | 4.1                       | 49                                         | 67                  |                    |
| Try4    | FEFANGYATVHIATTGVK   | K                   | L               | 95.00%                             | 0                   | 0                 | 8.96                    |               | 976     | 2                    | 1949.98         | 4                         | 49                                         | 67                  |                    |
| Try4    | FEFANGYATVHIATTGVK   | K                   | L               | 95.00%                             | 0                   | 0                 | 11.2                    |               | 976     | 2                    | 1949.99         | 4                         | 49                                         | 67                  |                    |
| Try4    | FEFANGYATVHIATTGVK   | K                   | L               | 95.00%                             | 0                   | 0                 | 6.92                    |               | 975.99  | 2                    | 1949.97         | 4                         | 49                                         | 67                  |                    |
| Try4    | FEFANGYATVHIATTGVK   | K                   | L               | 95.00%                             | 0                   | 0                 | 8.17                    |               | 975.98  | 2                    | 1949.94         | 4                         | 49                                         | 67                  |                    |
| Try4    | FEFANGYATVHIATTGVK   | K                   | L               | 95.00%                             | 0                   | 0                 | 9.68                    |               | 975.98  | 2                    | 1949.95         | 4                         | 49                                         | 67                  |                    |
| Try4    | FEFANGYATVHIATTGVK   | K                   | L               | 95.00%                             | 0                   | 0                 | 9.62                    |               | 975.97  | 2                    | 1949.92         | 3.9                       | 49                                         | 67                  |                    |
| Try4    | FEFANGYATVHIATTGVK   | K                   | L               | 95.00%                             | 0                   | 0                 | 7.52                    |               | 975.96  | 2                    | 1949.9          | 3.9                       | 49                                         | 67                  |                    |
| Try4    | FEFANGYATVHIATTGVK   | K                   | L               | 95.00%                             | 0                   | 0                 | 11.2                    |               | 975.96  | 2                    | 1949.9          | 3.9                       | 49                                         | 67                  |                    |
| Try4    | FEFANGYATVHIATTGVK   | K                   | L               | 95.00%                             | 0                   | 0                 | 12                      |               | 975.96  | 2                    | 1949.91         | 3.9                       | 49                                         | 67                  |                    |
| Try4    | FEFANGYATVHIATTGVK   | K                   | L               | 95.00%                             | 0                   | 0                 | 12.7                    |               | 975.95  | 2                    | 1949.88         | 3.9                       | 49                                         | 67                  |                    |
| Try4    | FEFANGYATVHIATTGVK   | K                   | L               | 95.00%                             | 0                   | 0                 | 8.96                    |               | 975.95  | 2                    | 1949.88         | 3.9                       | 49                                         | 67                  |                    |
| Try4    | FEFANGYATVHIATTGVK   | K                   | L               | 95.00%                             | 0                   | 0                 | 8.19                    |               | 975.95  | 2                    | 1949.89         | 3.9                       | 49                                         | 67                  |                    |
| Try4    | FEFANGYATVHIATTGVK   | K                   | L               | 95.00%                             | 0                   | 0                 | 8.96                    |               | 975.94  | 2                    | 1949.89         | 3.9                       | 49                                         | 67                  |                    |
| Try4    | FEFANGYATVHIATTGVK   | K                   | L               | 95.00%                             | 0                   | 0                 | 8.89                    |               | 975.94  | 2                    | 1949.86         | 3.9                       | 49                                         | 67                  |                    |
| Try4    | FEFANGYATVHIATTGVK   | K                   | L               | 95.00%                             | 0                   | 0                 | 9.6                     |               | 975.92  | 2                    | 1949.83         | 3.9                       | 49                                         | 67                  |                    |
| Try4    | FEFANGYATVHIATTGVK   | K                   | L               | 95.00%                             | 0                   | 0                 | 10.5                    |               | 975.9   | 2                    | 1949.78         | 3.8                       | 49                                         | 67                  |                    |
| Try4    | FEFANGYATVHIATTGVK   | K                   | L               | 95.00%                             | 5.57                | 0                 | 8.96                    |               | 975.83  | 2                    | 1949.64         | 3.7                       | 49                                         | 67                  |                    |
| Try4    | FEFANGYATVHIATTGVK   | K                   | L               | 95.00%                             | 5.74                | 0                 | 12                      |               | 975.73  | 2                    | 1949.44         | 3.4                       | 49                                         | 67                  |                    |
| Try4    | FEFANGYATVHIATTGVK   | K                   | L               | 95.00%                             | 5.71                | 0                 | 10.5                    |               | 975.72  | 2                    | 1949.43         | 3.5                       | 49                                         | 67                  |                    |
| Try4    | FEFANGYATVHIATTGVK   | K                   | L               | 95.00%                             | 5.84                | 0                 | 9.12                    |               | 975.7   | 2                    | 1949.38         | 3.4                       | 49                                         | 67                  |                    |
| Try4    | FEFANGYATVHIATTGVK   | K                   | L               | 95.00%                             | 5.71                | 0                 | 8.96                    |               | 975.7   | 2                    | 1949.39         | 3.4                       | 49                                         | 67                  |                    |
| Try4    | FEFANGYATVHIATTGVK   | K                   | L               | 95.00%                             | 5.63                | 0                 | 9.64                    |               | 975.7   | 2                    | 1949.39         | 3.4                       | 49                                         | 67                  |                    |
| Try4    | FEFANGYATVHIATTGVK   | K                   | L               | 95.00%                             | 5.95                | 0                 | 11.2                    |               | 975.64  | 2                    | 1949.26         | 3.3                       | 49                                         | 67                  |                    |
| Try4    | FEFANGYATVHIATTGVK   | K                   | L               | 95.00%                             | 5.64                | 0                 | 10.5                    |               | 975.63  | 2                    | 1949.25         | 3.3                       | 49                                         | 67                  |                    |
| Try4    | FEFANGYATVHIATTGVK   | K                   | L               | 95.00%                             | 5.48                | 0                 | 6.92                    |               | 975.61  | 2                    | 1949.21         | 3.2                       | 49                                         | 67                  |                    |
| Try4    | FEFANGYATVHIATTGVK   | K                   | L               | 95.00%                             | 5.63                | 0                 | 10.4                    |               | 975.59  | 2                    | 1949.16         | 3.2                       | 49                                         | 67                  |                    |
| Try4    | FEFANGYATVHIATTGVK   | K                   | L               | 95.00%                             | 5.63                | 0                 | 10.4                    |               | 975.59  | 2                    | 1949.17         | 3.2                       | 49                                         | 67                  |                    |
| Try4    | FEFANGYATVHIATTGVK   | K                   | L               | 95.00%                             | 5.56                | 0                 | 8.96                    |               | 975.58  | 2                    | 1949.14         | 3.2                       | 49                                         | 67                  |                    |
| Try4    | FEFANGYATVHIATTGVK   | K                   | L               | 95.00%                             | 5.92                | 0                 | 12                      |               | 975.58  | 2                    | 1949.15         | 3.2                       | 49                                         | 67                  |                    |
| Try4    | FEFANGYATVHIATTGVK   | K                   | L               | 95.00%                             | 5.62                | 0                 | 10.5                    |               | 975.58  | 2                    | 1949.15         | 3.2                       | 49                                         | 67                  |                    |
| Try4    | FEFANGYATVHIATTGVK   | K                   | L               | 95.00%                             | 5.88                | 0                 | 11.2                    |               | 975.58  | 2                    | 1949.15         | 3.2                       | 49                                         | 67                  |                    |
| Try4    | FEFANGYATVHIATTGVK   | K                   | L               | 95.00%                             | 5.38                | 0                 | 10.5                    |               | 975.57  | 2                    | 1949.13         | 3.1                       | 49                                         | 67                  |                    |
| Try4    | FEFANGYATVHIATTGVK   | K                   | L               | 95.00%                             | 5.61                | 0                 | 9                       |               | 975.54  | 2                    | 1949.07         | 3.1                       | 49                                         | 67                  |                    |
| Try4    | FEFANGYATVHIATTGVK   | K                   | L               | 95.00%                             | 6.02                | 0                 | 10.5                    |               | 975.53  | 2                    | 1949.04         | 3.1                       | 49                                         | 67                  |                    |
| Try4    | FEFANGYATVHIATTGVK   | K                   | L               | 95.00%                             | 5.96                | 0                 | 12.7                    |               | 975.52  | 2                    | 1949.02         | 3                         | 49                                         | 67                  |                    |
| Try4    | FEFANGYATVHIATTGVK   | K                   | L               | 95.00%                             | 5.52                | 0                 | 11.2                    |               | 975.52  | 2                    | 1949.03         | 3.1                       | 49                                         | 67                  |                    |

|      |                    |   |   |        |      |   |      |  |        |   |         |      |    |    |
|------|--------------------|---|---|--------|------|---|------|--|--------|---|---------|------|----|----|
| Try4 | FEFANGYATVHIATTGVK | K | L | 95.00% | 5.75 | 0 | 11.2 |  |        |   | 1949.03 | 3.1  | 49 | 67 |
| Try4 | FEFANGYATVHIATTGVK | K | L | 95.00% | 5.87 | 0 | 9.66 |  | 975.51 | 2 | 1949.01 | 9.6  | 49 | 67 |
| Try4 | FEFANGYATVHIATTGVK | K | L | 95.00% | 5.99 | 0 | 10.5 |  | 975.49 | 2 | 1948.97 | 3    | 49 | 67 |
| Try4 | FEFANGYATVHIATTGVK | K | L | 95.00% | 5.65 | 0 | 10.4 |  | 975.48 | 2 | 1948.94 | 3    | 49 | 67 |
| Try4 | FEFANGYATVHIATTGVK | K | L | 95.00% | 5.53 | 0 | 12   |  | 975.47 | 2 | 1948.93 | 3    | 49 | 67 |
| Try4 | FEFANGYATVHIATTGVK | K | L | 95.00% | 5.99 | 0 | 11.2 |  | 975.47 | 2 | 1948.93 | 3    | 49 | 67 |
| Try4 | FEFANGYATVHIATTGVK | K | L | 95.00% | 5.67 | 0 | 10.5 |  | 975.47 | 2 | 1948.93 | 3    | 49 | 67 |
| Try4 | FEFANGYATVHIATTGVK | K | L | 95.00% | 5.54 | 0 | 10.5 |  | 975.46 | 2 | 1948.9  | 3    | 49 | 67 |
| Try4 | FEFANGYATVHIATTGVK | K | L | 95.00% | 5.62 | 0 | 10.5 |  | 975.44 | 2 | 1948.87 | 2.9  | 49 | 67 |
| Try4 | FEFANGYATVHIATTGVK | K | L | 95.00% | 5.64 | 0 | 11.2 |  | 975.44 | 2 | 1948.87 | 2.9  | 49 | 67 |
| Try4 | FEFANGYATVHIATTGVK | K | L | 95.00% | 5.87 | 0 | 9.77 |  | 975.43 | 2 | 1948.84 | 2.9  | 49 | 67 |
| Try4 | FEFANGYATVHIATTGVK | K | L | 95.00% | 5.6  | 0 | 11.9 |  | 975.43 | 2 | 1948.84 | 2.9  | 49 | 67 |
| Try4 | FEFANGYATVHIATTGVK | K | L | 95.00% | 5.74 | 0 | 11.2 |  | 975.42 | 2 | 1948.83 | 2.9  | 49 | 67 |
| Try4 | FEFANGYATVHIATTGVK | K | L | 95.00% | 5.44 | 0 | 7.52 |  | 975.41 | 2 | 1948.8  | 2.8  | 49 | 67 |
| Try4 | FEFANGYATVHIATTGVK | K | L | 95.00% | 5.95 | 0 | 12   |  | 975.39 | 2 | 1948.77 | 2.8  | 49 | 67 |
| Try4 | FEFANGYATVHIATTGVK | K | L | 95.00% | 5.54 | 0 | 8.96 |  | 975.37 | 2 | 1948.72 | 2.7  | 49 | 67 |
| Try4 | FEFANGYATVHIATTGVK | K | L | 95.00% | 5.81 | 0 | 10.5 |  | 975.36 | 2 | 1948.7  | 2.7  | 49 | 67 |
| Try4 | FEFANGYATVHIATTGVK | K | L | 95.00% | 5.8  | 0 | 8.18 |  | 975.34 | 2 | 1948.67 | 2.7  | 49 | 67 |
| Try4 | FEFANGYATVHIATTGVK | K | L | 95.00% | 5.86 | 0 | 9.64 |  | 975.3  | 2 | 1948.59 | 2.6  | 49 | 67 |
| Try4 | FEFANGYATVHIATTGVK | K | L | 95.00% | 5.78 | 0 | 10.4 |  | 975.29 | 2 | 1948.57 | 2.6  | 49 | 67 |
| Try4 | FEFANGYATVHIATTGVK | K | L | 95.00% | 5.9  | 0 | 12   |  | 975.29 | 2 | 1948.57 | 2.6  | 49 | 67 |
| Try4 | FEFANGYATVHIATTGVK | K | L | 95.00% | 5.47 | 0 | 9.64 |  | 975.29 | 2 | 1948.57 | 2.6  | 49 | 67 |
| Try4 | FEFANGYATVHIATTGVK | K | L | 95.00% | 5.87 | 0 | 11.9 |  | 975.24 | 2 | 1948.47 | 2.5  | 49 | 67 |
| Try4 | FEFANGYATVHIATTGVK | K | L | 95.00% | 5.66 | 0 | 10.5 |  | 975.14 | 2 | 1948.27 | 2.3  | 49 | 67 |
| Try4 | FEFANGYATVHIATTGVK | K | L | 95.00% | 5.55 | 0 | 11.2 |  | 975.12 | 2 | 1948.22 | 2.2  | 49 | 67 |
| Try4 | FEFANGYATVHIATTGVK | K | L | 95.00% | 5.68 | 0 | 12   |  | 975.1  | 2 | 1948.19 | 2.2  | 49 | 67 |
| Try4 | FEFANGYATVHIATTGVK | K | L | 95.00% | 5.62 | 0 | 11.2 |  | 975.08 | 2 | 1948.15 | 2.2  | 49 | 67 |
| Try4 | FEFANGYATVHIATTGVK | K | L | 95.00% | 5.6  | 0 | 11.2 |  | 975.08 | 2 | 1948.15 | 2.2  | 49 | 67 |
| Try4 | FEFANGYATVHIATTGVK | K | L | 95.00% | 6.13 | 0 | 11.9 |  | 975.07 | 2 | 1948.13 | 2.1  | 49 | 67 |
| Try4 | FEFANGYATVHIATTGVK | K | L | 95.00% | 5.8  | 0 | 11.9 |  | 975.05 | 2 | 1948.08 | 2.1  | 49 | 67 |
| Try4 | FEFANGYATVHIATTGVK | K | L | 95.00% | 5.58 | 0 | 10.6 |  | 975.01 | 2 | 1948    | 2    | 49 | 67 |
| Try4 | FEFANGYATVHIATTGVK | K | L | 95.00% | 5.83 | 0 | 10.5 |  | 975.07 | 2 | 1948.01 | 2    | 49 | 67 |
| Try4 | FEFANGYATVHIATTGVK | K | L | 95.00% | 5.66 | 0 | 12   |  | 974.98 | 2 | 1947.95 | 2    | 49 | 67 |
| Try4 | FEFANGYATVHIATTGVK | K | L | 95.00% | 5.85 | 0 | 11.2 |  | 974.98 | 2 | 1947.95 | 2    | 49 | 67 |
| Try4 | FEFANGYATVHIATTGVK | K | L | 95.00% | 5.89 | 0 | 11.2 |  | 974.98 | 2 | 1947.95 | 2    | 49 | 67 |
| Try4 | FEFANGYATVHIATTGVK | K | L | 95.00% | 5.7  | 0 | 10.5 |  | 974.97 | 2 | 1947.93 | 1.9  | 49 | 67 |
| Try4 | FEFANGYATVHIATTGVK | K | L | 95.00% | 5.59 | 0 | 12   |  | 974.95 | 2 | 1947.89 | 1.9  | 49 | 67 |
| Try4 | FEFANGYATVHIATTGVK | K | L | 95.00% | 5.72 | 0 | 11.2 |  | 974.93 | 2 | 1947.84 | 1.9  | 49 | 67 |
| Try4 | FEFANGYATVHIATTGVK | K | L | 95.00% | 5.6  | 0 | 10.5 |  | 974.92 | 2 | 1947.82 | 1.8  | 49 | 67 |
| Try4 | FEFANGYATVHIATTGVK | K | L | 95.00% | 5.98 | 0 | 11.2 |  | 974.92 | 2 | 1947.82 | 1.8  | 49 | 67 |
| Try4 | FEFANGYATVHIATTGVK | K | L | 95.00% | 5.72 | 0 | 11.2 |  | 974.92 | 2 | 1947.83 | 1.9  | 49 | 67 |
| Try4 | FEFANGYATVHIATTGVK | K | L | 95.00% | 5.62 | 0 | 12   |  | 974.91 | 2 | 1947.8  | 1.8  | 49 | 67 |
| Try4 | FEFANGYATVHIATTGVK | K | L | 95.00% | 5.64 | 0 | 11.2 |  | 974.9  | 2 | 1947.78 | 1.8  | 49 | 67 |
| Try4 | FEFANGYATVHIATTGVK | K | L | 95.00% | 5.79 | 0 | 11.2 |  | 974.88 | 2 | 1947.75 | 1.8  | 49 | 67 |
| Try4 | FEFANGYATVHIATTGVK | K | L | 95.00% | 5.84 | 0 | 12   |  | 974.88 | 2 | 1947.7  | 1.8  | 49 | 67 |
| Try4 | FEFANGYATVHIATTGVK | K | L | 95.00% | 5.42 | 0 | 12   |  | 974.8  | 2 | 1947.58 | 1.6  | 49 | 67 |
| Try4 | FEFANGYATVHIATTGVK | K | L | 95.00% | 5.44 | 0 | 11.2 |  | 974.77 | 2 | 1947.53 | 1.6  | 49 | 67 |
| Try4 | FEFANGYATVHIATTGVK | K | L | 95.00% | 5.65 | 0 | 11.9 |  | 974.73 | 2 | 1947.44 | 1.5  | 49 | 67 |
| Try4 | FEFANGYATVHIATTGVK | K | L | 95.00% | 5.49 | 0 | 10.5 |  | 974.73 | 2 | 1947.45 | 1.5  | 49 | 67 |
| Try4 | FEFANGYATVHIATTGVK | K | L | 95.00% | 5.67 | 0 | 11.2 |  | 974.72 | 2 | 1947.42 | 1.5  | 49 | 67 |
| Try4 | FEFANGYATVHIATTGVK | K | L | 95.00% | 5.47 | 0 | 12   |  | 974.7  | 2 | 1947.38 | 1.4  | 49 | 67 |
| Try4 | FEFANGYATVHIATTGVK | K | L | 95.00% | 5.66 | 0 | 12   |  | 974.7  | 2 | 1947.39 | 1.4  | 49 | 67 |
| Try4 | FEFANGYATVHIATTGVK | K | L | 95.00% | 5.71 | 0 | 11.2 |  | 974.69 | 2 | 1947.36 | 1.4  | 49 | 67 |
| Try4 | FEFANGYATVHIATTGVK | K | L | 95.00% | 5.69 | 0 | 10.5 |  | 974.69 | 2 | 1947.37 | 1.4  | 49 | 67 |
| Try4 | FEFANGYATVHIATTGVK | K | L | 95.00% | 5.77 | 0 | 11.9 |  | 974.68 | 2 | 1947.34 | 1.4  | 49 | 67 |
| Try4 | FEFANGYATVHIATTGVK | K | L | 95.00% | 5.53 | 0 | 11.2 |  | 974.68 | 2 | 1947.35 | 1.4  | 49 | 67 |
| Try4 | FEFANGYATVHIATTGVK | K | L | 95.00% | 5.44 | 0 | 11.2 |  | 974.67 | 2 | 1947.32 | 1.4  | 49 | 67 |
| Try4 | FEFANGYATVHIATTGVK | K | L | 95.00% | 5.35 | 0 | 11.2 |  | 974.67 | 2 | 1947.32 | 1.4  | 49 | 67 |
| Try4 | FEFANGYATVHIATTGVK | K | L | 95.00% | 5.66 | 0 | 11.2 |  | 974.67 | 2 | 1947.33 | 1.4  | 49 | 67 |
| Try4 | FEFANGYATVHIATTGVK | K | L | 95.00% | 5.83 | 0 | 12.7 |  | 974.67 | 2 | 1947.33 | 1.4  | 49 | 67 |
| Try4 | FEFANGYATVHIATTGVK | K | L | 95.00% | 5.6  | 0 | 12.8 |  | 974.66 | 2 | 1947.3  | 1.3  | 49 | 67 |
| Try4 | FEFANGYATVHIATTGVK | K | L | 95.00% | 5.63 | 0 | 10.4 |  | 974.66 | 2 | 1947.3  | 1.3  | 49 | 67 |
| Try4 | FEFANGYATVHIATTGVK | K | L | 95.00% | 5.55 | 0 | 12   |  | 974.66 | 2 | 1947.31 | 1.3  | 49 | 67 |
| Try4 | FEFANGYATVHIATTGVK | K | L | 95.00% | 5.47 | 0 | 11.2 |  | 974.66 | 2 | 1947.31 | 1.3  | 49 | 67 |
| Try4 | FEFANGYATVHIATTGVK | K | L | 95.00% | 5.62 | 0 | 11.2 |  | 974.65 | 2 | 1947.28 | 1.3  | 49 | 67 |
| Try4 | FEFANGYATVHIATTGVK | K | L | 95.00% | 5.52 | 0 | 11.2 |  | 974.65 | 2 | 1947.28 | 1.3  | 49 | 67 |
| Try4 | FEFANGYATVHIATTGVK | K | L | 95.00% | 5.48 | 0 | 11.2 |  | 974.65 | 2 | 1947.29 | 1.3  | 49 | 67 |
| Try4 | FEFANGYATVHIATTGVK | K | L | 95.00% | 5.52 | 0 | 12.8 |  | 974.64 | 2 | 1947.27 | 1.3  | 49 | 67 |
| Try4 | FEFANGYATVHIATTGVK | K | L | 95.00% | 5.66 | 0 | 11.2 |  | 974.63 | 2 | 1947.24 | 1.3  | 49 | 67 |
| Try4 | FEFANGYATVHIATTGVK | K | L | 95.00% | 5.59 | 0 | 11.2 |  | 974.61 | 2 | 1947.2  | 1.2  | 49 | 67 |
| Try4 | FEFANGYATVHIATTGVK | K | L | 95.00% | 5.71 | 0 | 11.2 |  | 974.6  | 2 | 1947.18 | 1.2  | 49 | 67 |
| Try4 | FEFANGYATVHIATTGVK | K | L | 95.00% | 5.23 | 0 | 11.3 |  | 974.6  | 2 | 1947.19 | 1.2  | 49 | 67 |
| Try4 | FEFANGYATVHIATTGVK | K | L | 95.00% | 5.54 | 0 | 11.2 |  | 974.59 | 2 | 1947.17 | 1.2  | 49 | 67 |
| Try4 | FEFANGYATVHIATTGVK | K | L | 95.00% | 5.42 | 0 | 10.5 |  | 974.58 | 2 | 1947.14 | 1.2  | 49 | 67 |
| Try4 | FEFANGYATVHIATTGVK | K | L | 95.00% | 5.45 | 0 | 11.2 |  | 974.53 | 2 | 1947.04 | 1.1  | 49 | 67 |
| Try4 | FEFANGYATVHIATTGVK | K | L | 95.00% | 5.39 | 0 | 10.5 |  | 974.49 | 2 | 1946.96 | 0.98 | 49 | 67 |
| Try4 | FEFANGYATVHIATTGVK | K | L | 95.00% | 5.69 | 0 | 12   |  | 974.39 | 2 | 1946.77 | 0.79 | 49 | 67 |
| Try4 | FEFANGYATVHIATTGVK | K | L | 95.00% | 5.33 | 0 | 12.8 |  | 974.22 | 2 | 1946.42 | 0.44 | 49 | 67 |
| Try4 | FEFANGYATVHIATTGVK | K | L | 95.00% | 4.86 | 0 | 12.8 |  | 974.13 | 2 | 1946.24 | 0.26 | 49 | 67 |
| Try4 | FEFANGYATVHIATTGVK | K | L | 95.00% | 4.79 | 0 | 12   |  | 974.12 | 2 | 1946.23 | 0.25 | 49 | 67 |
| Try4 | FEFANGYATVHIATTGVK | K | L | 95.00% | 5.05 | 0 | 12   |  | 974.11 | 2 | 1946.2  | 0.22 | 49 | 67 |
| Try4 | FEFANGYATVHIATTGVK | K | L | 95.00% | 0    | 0 | 8.33 |  | 651.1  | 3 | 1950.21 | 4.3  | 49 | 67 |
| Try4 | FEFANGYATVHIATTGVK | K | L | 95.00% | 0    | 0 | 8.68 |  | 651.1  | 3 | 1950.27 | 4.3  | 49 | 67 |
| Try4 | FEFANGYATVHIATTGVK | K | L | 95.00% | 0    | 0 | 10.3 |  | 651.1  | 3 | 1950.28 | 4.3  | 49 | 67 |
| Try4 | FEFANGYATVHIATTGVK | K | L | 95.00% | 0    | 0 | 7.47 |  | 651.1  | 3 | 1950.28 | 4.3  | 49 | 67 |
| Try4 | FEFANGYATVHIATTGVK | K | L | 95.00% | 0    | 0 | 10.3 |  | 651.09 | 3 | 1950.23 | 4.3  | 49 | 67 |
| Try4 | FEFANGYATVHIATTGVK | K | L | 95.00% | 0    | 0 | 6.85 |  | 651.09 | 3 | 1950.24 | 4.3  | 49 | 67 |
| Try4 | FEFANGYATVHIATTGVK | K | L | 95.00% | 0    | 0 | 10.4 |  | 651.08 | 3 | 1950.21 | 4.2  | 49 | 67 |
| Try4 | FEFANGYATVHIATTGVK | K | L | 95.00% | 0    | 0 | 8.57 |  | 651.08 | 3 | 1950.21 | 4.2  | 49 | 67 |
| Try4 | FEFANGYATVHIATTGVK | K | L | 95.00% | 0    | 0 | 10.5 |  | 651.05 | 3 | 1950.23 | 4.3  | 49 | 67 |
| Try4 | FEFANGYATVHIATTGVK | K | L | 95.00% | 0    | 0 | 8.33 |  | 651.01 | 3 | 1950    | 4    | 49 | 67 |
| Try4 | FEFANGYATVHIATTGVK | K | L | 95.00% | 0    | 0 | 10.5 |  | 650.98 | 3 | 1949.9  | 3.9  | 49 | 67 |
| Try4 | FEFANGYATVHIATTGVK | K | L | 95.00% | 0    | 0 | 9.1  |  | 650.95 | 3 | 1949.83 | 3.9  | 49 | 67 |
| Try4 | FEFANGYATVHIATTGVK | K | L | 95.00% | 0    | 0 | 9.89 |  | 650.91 | 3 | 1949.71 | 3.7  | 49 | 67 |
| Try4 | FEFANGYATVHIATTGVK | K | L | 95.00% | 0    | 0 | 9.57 |  | 650.9  | 3 | 1949.66 | 3.7  | 49 | 67 |
| Try4 | FEFANGYATVHIATTGVK | K | L | 95.00% | 4.52 | 0 | 8.27 |  | 650.89 | 3 | 1949.64 | 3.7  | 49 | 67 |
| Try4 | FEFANGYATVHIATTGVK | K | L | 95.00% | 4.55 | 0 | 12.3 |  | 650.89 | 3 | 1949.65 | 3.7  | 49 | 67 |
| Try4 | FEFANGYATVHIATTGVK | K | L | 95.00% | 4.49 | 0 | 11.8 |  | 650.89 | 3 | 1949.65 | 3.7  | 49 | 67 |
| Try4 | FEFANGYATVHIATTGVK | K | L | 95.00% | 4.54 | 0 | 10.4 |  | 650.84 | 3 | 1949.61 | 3.6  | 49 | 67 |
| Try4 |                    |   |   |        |      |   |      |  |        |   |         |      |    |    |

|      |                          |   |   |        |      |       |      |                                           |         |         |         |      |     |     |
|------|--------------------------|---|---|--------|------|-------|------|-------------------------------------------|---------|---------|---------|------|-----|-----|
| Try4 | FEFANGYATVTHATTGVK       | K | L | 95.00% | 4.6  | 0     | 9.72 | 650.84                                    | 3       | 1949.5  | 3.5     | 49   | 67  |     |
| Try4 | FEFANGYATVTHATTGVK       | K | L | 95.00% | 4.72 | 0     | 11.6 | 650.83                                    | 3       | 1949.46 | 3.5     | 49   | 67  |     |
| Try4 | FEFANGYATVTHATTGVK       | K | L | 95.00% | 4.15 | 0     | 10.9 | 650.81                                    | 3       | 1949.39 | 3.4     | 49   | 67  |     |
| Try4 | FEFANGYATVTHATTGVK       | K | L | 95.00% | 4.58 | 0     | 10.9 | 650.81                                    | 3       | 1949.4  | 3.4     | 49   | 67  |     |
| Try4 | FEFANGYATVTHATTGVK       | K | L | 95.00% | 4.69 | 0     | 8.6  | 650.78                                    | 3       | 1949.3  | 3.3     | 49   | 67  |     |
| Try4 | FEFANGYATVTHATTGVK       | K | L | 95.00% | 4.71 | 0     | 12.4 | 650.77                                    | 3       | 1949.27 | 3.3     | 49   | 67  |     |
| Try4 | FEFANGYATVTHATTGVK       | K | L | 95.00% | 4.45 | 0     | 12.2 | 650.75                                    | 3       | 1949.21 | 3.2     | 49   | 67  |     |
| Try4 | FEFANGYATVTHATTGVK       | K | L | 95.00% | 4.23 | 0     | 11.8 | 650.75                                    | 3       | 1949.21 | 3.2     | 49   | 67  |     |
| Try4 | FEFANGYATVTHATTGVK       | K | L | 95.00% | 4.57 | 0     | 10.4 | 650.75                                    | 3       | 1949.23 | 3.3     | 49   | 67  |     |
| Try4 | FEFANGYATVTHATTGVK       | K | L | 95.00% | 4.55 | 0     | 10.4 | 650.72                                    | 3       | 1949.14 | 3.2     | 49   | 67  |     |
| Try4 | FEFANGYATVTHATTGVK       | K | L | 95.00% | 4.72 | 0     | 10.6 | 650.71                                    | 3       | 1949.1  | 3.1     | 49   | 67  |     |
| Try4 | FEFANGYATVTHATTGVK       | K | L | 95.00% | 4.6  | 0     | 12.7 | 650.7                                     | 3       | 1949.07 | 3.1     | 49   | 67  |     |
| Try4 | FEFANGYATVTHATTGVK       | K | L | 95.00% | 4.52 | 0     | 11.1 | 650.68                                    | 3       | 1949    | 3       | 49   | 67  |     |
| Try4 | FEFANGYATVTHATTGVK       | K | L | 95.00% | 4.64 | 0     | 10.5 | 650.66                                    | 3       | 1948.95 | 3       | 49   | 67  |     |
| Try4 | FEFANGYATVTHATTGVK       | K | L | 95.00% | 4.79 | 0     | 11.2 | 650.66                                    | 3       | 1948.96 | 3       | 49   | 67  |     |
| Try4 | FEFANGYATVTHATTGVK       | K | L | 95.00% | 4.6  | 0     | 10.7 | 650.65                                    | 3       | 1948.93 | 3       | 49   | 67  |     |
| Try4 | FEFANGYATVTHATTGVK       | K | L | 95.00% | 4.51 | 0     | 10.9 | 650.64                                    | 3       | 1948.89 | 2.9     | 49   | 67  |     |
| Try4 | FEFANGYATVTHATTGVK       | K | L | 95.00% | 4.66 | 0     | 12.3 | 650.64                                    | 3       | 1948.9  | 2.9     | 49   | 67  |     |
| Try4 | FEFANGYATVTHATTGVK       | K | L | 95.00% | 4.26 | 0     | 11.6 | 650.64                                    | 3       | 1948.9  | 2.9     | 49   | 67  |     |
| Try4 | FEFANGYATVTHATTGVK       | K | L | 95.00% | 4.17 | 0     | 13   | 650.59                                    | 3       | 1948.73 | 2.8     | 49   | 67  |     |
| Try4 | FEFANGYATVTHATTGVK       | K | L | 95.00% | 4.33 | 0     | 11.8 | 650.58                                    | 3       | 1948.72 | 2.7     | 49   | 67  |     |
| Try4 | FEFANGYATVTHATTGVK       | K | L | 95.00% | 4.68 | 0     | 12.4 | 650.56                                    | 3       | 1948.66 | 2.7     | 49   | 67  |     |
| Try4 | FEFANGYATVTHATTGVK       | K | L | 95.00% | 4.36 | 0     | 10.9 | 650.55                                    | 3       | 1948.63 | 2.6     | 49   | 67  |     |
| Try4 | FEFANGYATVTHATTGVK       | K | L | 95.00% | 4.41 | 0     | 10.9 | 650.53                                    | 3       | 1948.55 | 2.6     | 49   | 67  |     |
| Try4 | FEFANGYATVTHATTGVK       | K | L | 95.00% | 4.54 | 0     | 10.9 | 650.53                                    | 3       | 1948.58 | 2.6     | 49   | 67  |     |
| Try4 | FEFANGYATVTHATTGVK       | K | L | 95.00% | 4.84 | 0     | 12.3 | 650.52                                    | 3       | 1948.52 | 2.5     | 49   | 67  |     |
| Try4 | FEFANGYATVTHATTGVK       | K | L | 95.00% | 4.49 | 0     | 11.2 | 650.51                                    | 3       | 1948.49 | 2.5     | 49   | 67  |     |
| Try4 | FEFANGYATVTHATTGVK       | K | L | 95.00% | 4.98 | 0     | 10.5 | 650.5                                     | 3       | 1948.48 | 2.5     | 49   | 67  |     |
| Try4 | FEFANGYATVTHATTGVK       | K | L | 95.00% | 4.8  | 0     | 11.6 | 650.47                                    | 3       | 1948.39 | 2.4     | 49   | 67  |     |
| Try4 | FEFANGYATVTHATTGVK       | K | L | 95.00% | 5.02 | 0     | 9.8  | 650.44                                    | 3       | 1948.3  | 2.3     | 49   | 67  |     |
| Try4 | FEFANGYATVTHATTGVK       | K | L | 95.00% | 4.25 | 0     | 12.5 | 650.42                                    | 3       | 1948.24 | 2.3     | 49   | 67  |     |
| Try4 | FEFANGYATVTHATTGVK       | K | L | 95.00% | 4.17 | 0     | 12.9 | 650.42                                    | 3       | 1948.24 | 2.3     | 49   | 67  |     |
| Try4 | FEFANGYATVTHATTGVK       | K | L | 95.00% | 4.55 | 0     | 11.6 | 650.37                                    | 3       | 1948.09 | 2.1     | 49   | 67  |     |
| Try4 | FEFANGYATVTHATTGVK       | K | L | 95.00% | 4.44 | 0     | 13.1 | 650.36                                    | 3       | 1948.04 | 2.1     | 49   | 67  |     |
| Try4 | FEFANGYATVTHATTGVK       | K | L | 95.00% | 4.88 | 0     | 12.6 | 650.36                                    | 3       | 1948.04 | 2.1     | 49   | 67  |     |
| Try4 | FEFANGYATVTHATTGVK       | K | L | 95.00% | 4.3  | 0     | 11.6 | 650.35                                    | 3       | 1948.05 | 2.1     | 49   | 67  |     |
| Try4 | FEFANGYATVTHATTGVK       | K | L | 95.00% | 4.5  | 0     | 12.6 | 650.35                                    | 3       | 1948.02 | 2       | 49   | 67  |     |
| Try4 | FEFANGYATVTHATTGVK       | K | L | 95.00% | 4.45 | 0     | 10.4 | 650.31                                    | 3       | 1947.9  | 1.9     | 49   | 67  |     |
| Try4 | FEFANGYATVTHATTGVK       | K | L | 95.00% | 4.54 | 0     | 13.2 | 650.26                                    | 3       | 1947.74 | 1.8     | 49   | 67  |     |
| Try4 | FEFANGYATVTHATTGVK       | K | L | 95.00% | 4.44 | 0     | 14   | 650.23                                    | 3       | 1947.65 | 1.7     | 49   | 67  |     |
| Try4 | FEFANGYATVTHATTGVK       | K | L | 95.00% | 4.3  | 0     | 11.7 | 650.23                                    | 3       | 1947.65 | 1.7     | 49   | 67  |     |
| Try4 | FEFANGYATVTHATTGVK       | K | L | 95.00% | 4.16 | 0     | 11.7 | 650.23                                    | 3       | 1947.66 | 1.7     | 49   | 67  |     |
| Try4 | FEFANGYATVTHATTGVK       | K | L | 95.00% | 4.67 | 0     | 11   | 650.21                                    | 3       | 1947.6  | 1.6     | 49   | 67  |     |
| Try4 | FEFANGYATVTHATTGVK       | K | L | 95.00% | 4.63 | 0     | 10.9 | 650.21                                    | 3       | 1947.6  | 1.6     | 49   | 67  |     |
| Try4 | FEFANGYATVTHATTGVK       | K | L | 95.00% | 4.43 | 0     | 11.6 | 650.19                                    | 3       | 1947.55 | 1.6     | 49   | 67  |     |
| Try5 | LTPGFHGLHHQVVK           | K | C | 95.00% | 0    | 0     | 6.35 | 548.53                                    | 3       | 1642.56 | 2.7     | 68   | 82  |     |
| Try5 | LTPGFHGLHHQVVK           | K | C | 95.00% | 0    | 0     | 6.5  | 548.23                                    | 3       | 1641.65 | 1.8     | 68   | 82  |     |
| Try5 | LTPGFHGLHHQVVK           | K | C | 95.00% | 0    | 0     | 6.59 | 547.6                                     | 3       | 1639.77 | -0.12   | 68   | 82  |     |
| Try6 | HHQVVK                   | L | C | 95.00% | 2.41 | 0.981 | 0    | 410.44                                    | 2       | 818.87  | 1.4     | 76   | 82  |     |
| Try6 | HHQVVK                   | L | C | 95.00% | 2.41 | 0.88  | 0    | 409.91                                    | 2       | 817.81  | 0.36    | 76   | 82  |     |
| Try7 | GDGSAMLVTTFDAFTMDDLSSGAK | R | T | 95.00% | 0    | 0     | 7.1  | M6: Oxidation (+16), M16: Oxidation (+16) | 1226.36 | 2       | 2450.7  | 2.6  | 126 | 149 |
| Try7 | GDGSAMLVTTFDAFTMDDLSSGAK | R | T | 95.00% | 0    | 0     | 7.52 | M6: Oxidation (+16), M16: Oxidation (+16) | 1226.01 | 2       | 2450    | 1.9  | 126 | 149 |
| Try7 | GDGSAMLVTTFDAFTMDDLSSGAK | R | T | 95.00% | 0    | 0     | 7.14 | M6: Oxidation (+16), M16: Oxidation (+16) | 1225.97 | 2       | 2449.93 | 1.6  | 126 | 149 |
| Try7 | GDGSAMLVTTFDAFTMDDLSSGAK | R | T | 95.00% | 0    | 0     | 8.28 | M6: Oxidation (+16), M16: Oxidation (+16) | 1225.69 | 2       | 2449.36 | 1.3  | 126 | 149 |
| Try7 | GDGSAMLVTTFDAFTMDDLSSGAK | R | T | 95.00% | 0    | 0     | 7.68 | M6: Oxidation (+16), M16: Oxidation (+16) | 1225.52 | 2       | 2449.03 | 0.93 | 126 | 149 |
| Try7 | GDGSAMLVTTFDAFTMDDLSSGAK | R | T | 95.00% | 0    | 0     | 8.18 | M6: Oxidation (+16), M16: Oxidation (+16) | 1225.52 | 2       | 2449.03 | 0.93 | 126 | 149 |
| Try7 | GDGSAMLVTTFDAFTMDDLSSGAK | R | T | 95.00% | 0    | 0     | 8.48 | M6: Oxidation (+16), M16: Oxidation (+16) | 1225.49 | 2       | 2448.96 | 0.86 | 126 | 149 |
| Try7 | GDGSAMLVTTFDAFTMDDLSSGAK | R | T | 95.00% | 0    | 0     | 9.64 | M6: Oxidation (+16), M16: Oxidation (+16) | 1225.48 | 2       | 2448.95 | 0.85 | 126 | 149 |
| Try7 | GDGSAMLVTTFDAFTMDDLSSGAK | R | T | 95.00% | 0    | 0     | 6.54 | M16: Oxidation (+16)                      | 1219.06 | 2       | 2436.1  | 4    | 126 | 149 |
| Try7 | GDGSAMLVTTFDAFTMDDLSSGAK | R | T | 95.00% | 0    | 0     | 6.8  | M6: Oxidation (+16)                       | 1218.98 | 2       | 2435.94 | 3.8  | 126 | 149 |
| Try7 | GDGSAMLVTTFDAFTMDDLSSGAK | R | T | 95.00% | 0    | 0     | 6.89 | M6: Oxidation (+16)                       | 1218.97 | 2       | 2435.32 | 3.2  | 126 | 149 |
| Try7 | GDGSAMLVTTFDAFTMDDLSSGAK | R | T | 95.00% | 0    | 0     | 9.11 | M6: Oxidation (+16)                       | 1218.6  | 2       | 2435.18 | 3.1  | 126 | 149 |
| Try7 | GDGSAMLVTTFDAFTMDDLSSGAK | R | T | 95.00% | 0    | 0     | 7.54 | M16: Oxidation (+16)                      | 1218.59 | 2       | 2435.17 | 3.1  | 126 | 149 |
| Try7 | GDGSAMLVTTFDAFTMDDLSSGAK | R | T | 95.00% | 0    | 0     | 6.89 | M6: Oxidation (+16)                       | 1218.58 | 2       | 2435.15 | 3    | 126 | 149 |
| Try7 | GDGSAMLVTTFDAFTMDDLSSGAK | R | T | 95.00% | 0    | 0     | 8.12 | M6: Oxidation (+16)                       | 1218.58 | 2       | 2435.15 | 3    | 126 | 149 |
| Try7 | GDGSAMLVTTFDAFTMDDLSSGAK | R | T | 95.00% | 0    | 0     | 8.28 | M6: Oxidation (+16)                       | 1218.55 | 2       | 2435.08 | 3    | 126 | 149 |
| Try7 | GDGSAMLVTTFDAFTMDDLSSGAK | R | T | 95.00% | 0    | 0     | 7.52 | M6: Oxidation (+16)                       | 1218.55 | 2       | 2435.09 | 3    | 126 | 149 |
| Try7 | GDGSAMLVTTFDAFTMDDLSSGAK | R | T | 95.00% | 0    | 0     | 6.89 | M6: Oxidation (+16)                       | 1218.55 | 2       | 2435.09 | 3    | 126 | 149 |
| Try7 | GDGSAMLVTTFDAFTMDDLSSGAK | R | T | 95.00% | 0    | 0     | 6.72 | M6: Oxidation (+16)                       | 1218.54 | 2       | 2435.06 | 3    | 126 | 149 |
| Try7 | GDGSAMLVTTFDAFTMDDLSSGAK | R | T | 95.00% | 0    | 0     | 7.57 | M6: Oxidation (+16)                       | 1218.54 | 2       | 2435.07 | 3    | 126 | 149 |
| Try7 | GDGSAMLVTTFDAFTMDDLSSGAK | R | T | 95.00% | 0    | 0     | 6.8  | M6: Oxidation (+16)                       | 1218.53 | 2       | 2435.04 | 2.9  | 126 | 149 |
| Try7 | GDGSAMLVTTFDAFTMDDLSSGAK | R | T | 95.00% | 0    | 0     | 8.82 | M16: Oxidation (+16)                      | 1218.5  | 2       | 2434.99 | 2.9  | 126 | 149 |
| Try7 | GDGSAMLVTTFDAFTMDDLSSGAK | R | T | 95.00% | 0    | 0     | 9.15 | M6: Oxidation (+16)                       | 1218.49 | 2       | 2434.97 | 2.9  | 126 | 149 |
| Try7 | GDGSAMLVTTFDAFTMDDLSSGAK | R | T | 95.00% | 0    | 0     | 7.41 | M6: Oxidation (+16)                       | 1218.48 | 2       | 2434.94 | 2.8  | 126 | 149 |
| Try7 | GDGSAMLVTTFDAFTMDDLSSGAK | R | T | 95.00% | 0    | 0     | 7.57 | M6: Oxidation (+16)                       | 1218.48 | 2       | 2434.94 | 2.8  | 126 | 149 |
| Try7 | GDGSAMLVTTFDAFTMDDLSSGAK | R | T | 95.00% | 0    | 0     | 7.72 | M6: Oxidation (+16)                       | 1218.48 | 2       | 2434.95 | 2.8  | 126 | 149 |
| Try7 | GDGSAMLVTTFDAFTMDDLSSGAK | R | T | 95.00% | 0    | 0     | 8.32 | M6: Oxidation (+16)                       | 1218.47 | 2       | 2434.92 | 2.8  | 126 | 149 |
| Try7 | GDGSAMLVTTFDAFTMDDLSSGAK | R | T | 95.00% | 0    | 0     | 9.72 | M6: Oxidation (+16)                       | 1218.47 | 2       | 2434.93 | 2.8  | 126 | 149 |
| Try7 | GDGSAMLVTTFDAFTMDDLSSGAK | R | T | 95.00% | 0    | 0     | 6.77 | M6: Oxidation (+16)                       | 1218.43 | 2       | 2434.84 | 2.7  | 126 | 149 |
| Try7 | GDGSAMLVTTFDAFTMDDLSSGAK | R | T | 95.00% | 0    | 0     | 8.17 | M6: Oxidation (+16)                       | 1218.42 | 2       | 2434.83 | 2.7  | 126 | 149 |
| Try7 | GDGSAMLVTTFDAFTMDDLSSGAK | R | T | 95.00% | 0    | 0     | 6.6  | M16: Oxidation (+16)                      | 1218.37 | 2       | 2434.73 | 2.6  | 126 | 149 |
| Try7 | GDGSAMLVTTFDAFTMDDLSSGAK | R | T | 95.00% | 0    | 0     | 6.8  | M6: Oxidation (+16)                       | 1218.35 | 2       | 2434.69 | 2.6  | 126 | 149 |
| Try7 | GDGSAMLVTTFDAFTMDDLSSGAK | R | T | 95.00% | 0    | 0     | 7.7  | M6: Oxidation (+16)                       | 1218.3  | 2       | 2434.59 | 2.5  | 126 | 149 |
| Try7 | GDGSAMLVTTFDAFTMDDLSSGAK | R | T | 95.00% | 0    | 0     | 8.17 | M6: Oxidation (+16)                       | 1218.26 | 2       | 2434.51 | 2.4  | 126 | 149 |
| Try7 | GDGSAMLVTTFDAFTMDDLSSGAK | R | T | 95.00% | 0    | 0     | 7.72 | M6: Oxidation (+16)                       | 1218.17 | 2       | 2434.32 | 2.2  | 126 | 149 |
| Try7 | GDGSAMLVTTFDAFTMDDLSSGAK | R | T | 95.00% | 0    | 0     | 9.02 | M6: Oxidation (+16)                       | 1218.17 | 2       | 2434.32 | 2.2  | 126 | 149 |
| Try7 | GDGSAMLVTTFDAFTMDDLSSGAK | R | T | 95.00% | 0    | 0     | 7.54 | M6: Oxidation (+16)                       | 1218.14 | 2       | 2434.27 | 2.2  | 126 | 149 |
| Try7 | GDGSAMLVTTFDAFTMDDLSSGAK | R | T | 95.00% | 0    | 0     | 8.4  | M6: Oxidation (+16)                       | 1218.12 | 2       | 2434.22 | 2.1  | 126 | 149 |
| Try7 | GDGSAMLVTTFDAFTMDDLSSGAK | R | T | 95.00% | 0    | 0     | 9    | M6: Oxidation (+16)                       | 1218.09 | 2       | 2434.16 | 2    | 126 | 149 |
| Try7 | GDGSAMLVTTFDAFTMDDLSSGAK | R | T | 95.00% | 0    | 0     | 6.4  | M6: Oxidation (+16)                       | 1218.09 | 2       | 2434.16 | 2    | 126 | 149 |
| Try7 | GDGSAMLVTTFDAFTMDDLSSGAK | R | T | 95.00% | 0    | 0     | 10   | M6: Oxidation (+16)                       | 1218.07 | 2       | 2434.12 | 2    | 126 | 149 |
| Try7 | GDGSAMLVTTFDAFTMDDLSSGAK | R | T | 95.00% | 0    | 0     | 6.96 | M6: Oxidation (+16)                       | 1218.07 | 2       | 2434.12 | 2    | 126 | 149 |
| Try7 | GDGSAMLVTTFDAFTMDDLSSGAK | R | T | 95.00% | 0    | 0     | 9.02 | M6: Oxidation (+16)                       | 1218.07 | 2       | 2434.12 | 2    | 126 | 149 |
| Try7 | GDGSAMLVTTFDAFTMDDLSSGAK | R | T | 95.00% | 0    | 0     | 8.18 | M6: Oxidation (+16)                       | 1218.06 | 2       | 2434.1  | 2    | 126 | 149 |
| Try7 | GDGSAMLVTTFDAFTMDDLSSGAK | R | T | 95.00% | 0    | 0     | 7.25 | M6: Oxidation (+16)                       | 1218.06 | 2       | 2434.11 | 2    | 126 | 149 |
| Try7 | GDGSAMLVTTFDAFTMDDLSSGAK | R | T | 95.00% | 0    | 0     | 6.92 | M6: Oxidation (+16)                       | 1218.06 | 2       | 2434    |      |     |     |























|       |                |   |   |        |      |   |      |         |   |         |      |     |     |
|-------|----------------|---|---|--------|------|---|------|---------|---|---------|------|-----|-----|
| Chy15 | ANIPPERY       | F | V | 95.00% | 2.14 | 0 | 2.59 | 480.59  | 2 | 959.17  | 0.69 | 162 | 169 |
| Chy15 | ANIPPERY       | F | V | 95.00% | 2.13 | 0 | 2.59 | 480.55  | 2 | 959.09  | 0.61 | 162 | 169 |
| Chy15 | ANIPPERY       | F | V | 95.00% | 2.1  | 0 | 2.59 | 480.49  | 2 | 958.97  | 0.49 | 162 | 169 |
| Chy16 | VQVNGTPGPDFTLL | Y | T | 95.00% | 2.37 | 0 | 3.62 | 1429.9  | 1 | 1428.89 | 2.2  | 170 | 183 |
| Chy16 | VQVNGTPGPDFTLL | Y | T | 95.00% | 2.34 | 0 | 3.6  | 1429.81 | 1 | 1428.8  | 2.1  | 170 | 183 |
| Chy16 | VQVNGTPGPDFTLL | Y | T | 95.00% | 2.47 | 0 | 4.12 | 1429.76 | 1 | 1428.75 | 2.1  | 170 | 183 |
| Chy16 | VQVNGTPGPDFTLL | Y | T | 95.00% | 2.08 | 0 | 3.5  | 1428.41 | 1 | 1427.4  | 0.71 | 170 | 183 |
| Chy16 | VQVNGTPGPDFTLL | Y | T | 95.00% | 2.2  | 0 | 3.54 | 1428.39 | 1 | 1427.38 | 0.69 | 170 | 183 |
| Chy16 | VQVNGTPGPDFTLL | Y | T | 95.00% | 2    | 0 | 3.54 | 1428.37 | 1 | 1427.36 | 0.67 | 170 | 183 |
| Chy16 | VQVNGTPGPDFTLL | Y | T | 95.00% | 3.14 | 0 | 2.89 | 715.8   | 2 | 1429.59 | 2.9  | 170 | 183 |
| Chy16 | VQVNGTPGPDFTLL | Y | T | 95.00% | 3.07 | 0 | 6.01 | 715.21  | 1 | 1428.4  | 1.7  | 170 | 183 |
| Chy16 | VQVNGTPGPDFTLL | Y | T | 95.00% | 2.87 | 0 | 6.01 | 714.95  | 2 | 1427.88 | 1.2  | 170 | 183 |
| Chy16 | VQVNGTPGPDFTLL | Y | T | 95.00% | 2.53 | 0 | 6.66 | 714.87  | 2 | 1427.73 | 1    | 170 | 183 |
| Chy16 | VQVNGTPGPDFTLL | Y | T | 95.00% | 1.75 | 0 | 4.01 | 714.84  | 2 | 1427.67 | 0.98 | 170 | 183 |
| Chy16 | VQVNGTPGPDFTLL | Y | T | 95.00% | 2.25 | 0 | 3.77 | 714.81  | 2 | 1427.6  | 0.91 | 170 | 183 |

**Thermolysin**

| Peptide sequence | Previous amino acid   | Next amino acid | Peptide identification probability | SEQUEST_XC score | SEQUEST_FC score | XU-Tandem_log(c) score | Modifications | Peptidom Mass (m/z) | Spectrum charge | Actual peptide mass (AMU) | Actual minus calculated peptide mass (AMU) | Peptide start index | Peptide stop index |
|------------------|-----------------------|-----------------|------------------------------------|------------------|------------------|------------------------|---------------|---------------------|-----------------|---------------------------|--------------------------------------------|---------------------|--------------------|
| TL1              | LTAPDGTK              | T               | V                                  | 95.00%           | 1.21             | 0                      | 1.89          | 802.8               | 1               | 801.79                    | 0.37                                       | 36                  | 43                 |
| TL1              | LTAPDGTK              | T               | V                                  | 95.00%           | 1.42             | 0                      | 1.85          | 802.67              | 1               | 801.66                    | 0.24                                       | 36                  | 43                 |
| TL1              | LTAPDGTK              | T               | V                                  | 95.00%           | 1.4              | 0                      | 1.85          | 802.53              | 1               | 801.52                    | 0.099                                      | 36                  | 43                 |
| TL1              | LTAPDGTK              | T               | V                                  | 95.00%           | 1.4              | 0                      | 1.85          | 802.46              | 1               | 801.45                    | 0.029                                      | 36                  | 43                 |
| TL2              | IATFGGK               | T               | L                                  | 95.00%           | 1.56             | 0                      | 1.13          | 746.52              | 1               | 745.51                    | 0.079                                      | 60                  | 67                 |
| TL3              | VAPTGGAGNPF           | S               | L                                  | 95.00%           | 2.56             | 0                      | 3.72          | 989.53              | 1               | 988.52                    | 2                                          | 88                  | 98                 |
| TL3              | VAPTGGAGNPF           | S               | L                                  | 95.00%           | 1.85             | 0                      | 3.72          | 987.73              | 1               | 986.72                    | 0.24                                       | 88                  | 98                 |
| TL3              | VAPTGGAGNPF           | S               | L                                  | 95.00%           | 1.52             | 0                      | 2.62          | 987.7               | 1               | 986.69                    | 0.21                                       | 88                  | 98                 |
| TL3              | VAPTGGAGNPF           | S               | L                                  | 95.00%           | 1.79             | 0                      | 3.72          | 987.62              | 1               | 986.61                    | 0.13                                       | 88                  | 98                 |
| TL3              | VAPTGGAGNPF           | S               | L                                  | 95.00%           | 1.57             | 0                      | 3.13          | 987.6               | 1               | 986.59                    | 0.11                                       | 88                  | 98                 |
| TL3              | VAPTGGAGNPF           | S               | L                                  | 95.00%           | 1.73             | 0                      | 4.28          | 987.52              | 1               | 986.51                    | 0.03                                       | 88                  | 98                 |
| TL3              | VAPTGGAGNPF           | S               | L                                  | 95.00%           | 1.88             | 0                      | 4.39          | 987.51              | 1               | 986.5                     | 0.02                                       | 88                  | 98                 |
| TL3              | VAPTGGAGNPF           | S               | L                                  | 95.00%           | 1.72             | 0                      | 1.55          | 987.5               | 1               | 986.49                    | 0.0099                                     | 88                  | 98                 |
| TL3              | VAPTGGAGNPF           | S               | L                                  | 95.00%           | 2.42             | 0                      | 6.72          | 494.98              | 2               | 987.95                    | 1.5                                        | 88                  | 98                 |
| TL3              | VAPTGGAGNPF           | S               | L                                  | 95.00%           | 2.74             | 0                      | 6.07          | 494.55              | 2               | 987.08                    | 0.6                                        | 88                  | 98                 |
| TL3              | VAPTGGAGNPF           | S               | L                                  | 95.00%           | 2.73             | 0                      | 6.72          | 494.48              | 2               | 986.94                    | 0.46                                       | 88                  | 98                 |
| TL3              | VAPTGGAGNPF           | S               | L                                  | 95.00%           | 2.64             | 0                      | 6.72          | 494.46              | 2               | 986.91                    | 0.43                                       | 88                  | 98                 |
| TL4              | LSAGGHYVPGHTGTPASGDLS | F               | L                                  | 95.00%           | 3.19             | 0                      | 7.7           | 1095.85             | 2               | 2189.69                   | 1.7                                        | 99                  | 121                |
| TL4              | LSAGGHYVPGHTGTPASGDLS | F               | L                                  | 95.00%           | 3.47             | 0                      | 7.03          | 1095.42             | 2               | 2188.82                   | 0.79                                       | 99                  | 121                |
| TL4              | LSAGGHYVPGHTGTPASGDLS | F               | L                                  | 95.00%           | 3.04             | 0                      | 8.43          | 1095.34             | 2               | 2188.67                   | 0.64                                       | 99                  | 121                |
| TL4              | LSAGGHYVPGHTGTPASGDLS | F               | L                                  | 95.00%           | 2.85             | 0                      | 7.03          | 1095.3              | 2               | 2188.59                   | 0.56                                       | 99                  | 121                |
| TL4              | LSAGGHYVPGHTGTPASGDLS | F               | L                                  | 95.00%           | 1.33             | 0                      | 4.04          | 730.9               | 3               | 2189.68                   | 1.7                                        | 99                  | 121                |
| TL4              | LSAGGHYVPGHTGTPASGDLS | F               | L                                  | 95.00%           | 1.75             | 0                      | 4.85          | 730.75              | 3               | 2189.23                   | 1.2                                        | 99                  | 121                |
| TL4              | LSAGGHYVPGHTGTPASGDLS | F               | L                                  | 95.00%           | 1.88             | 0                      | 5.75          | 730.69              | 3               | 2189.05                   | 1                                          | 99                  | 121                |
| TL4              | LSAGGHYVPGHTGTPASGDLS | F               | L                                  | 95.00%           | 1.8              | 0                      | 5.7           | 730.6               | 3               | 2188.78                   | 0.75                                       | 99                  | 121                |
| TL4              | LSAGGHYVPGHTGTPASGDLS | F               | L                                  | 95.00%           | 2.3              | 0                      | 7.92          | 730.11              | 3               | 2187.3                    | -0.73                                      | 99                  | 121                |
| TL5              | LSAGGHYVPGHTGTPASGD   | F               | L                                  | 95.00%           | 3.61             | 0                      | 7.96          | 640.81              | 3               | 1919.41                   | 2.5                                        | 99                  | 118                |
| TL5              | LSAGGHYVPGHTGTPASGD   | F               | L                                  | 95.00%           | 4.09             | 0                      | 8.14          | 640.5               | 3               | 1918.48                   | 1.6                                        | 99                  | 118                |
| TL6              | VRGDGSAML             | Q               | V                                  | 95.00%           | 1.93             | 0                      | 2.08          | 905.7               | 1               | 904.69                    | 0.25                                       | 124                 | 132                |
| TL6              | VRGDGSAML             | Q               | V                                  | 95.00%           | 1.78             | 0                      | 2.08          | 905.63              | 1               | 904.62                    | 0.18                                       | 124                 | 132                |
| TL7              | VQVNGTPGDETT          | Y               | L                                  | 95.00%           | 1.84             | 0.931                  | 3.96          | 1315.56             | 1               | 1314.55                   | 0.94                                       | 170                 | 182                |
| TL7              | VQVNGTPGDETT          | Y               | L                                  | 95.00%           | 2                | 0.97                   | 6             | 658.56              | 2               | 1315.1                    | 1.5                                        | 170                 | 182                |
| TL8              | LITGDAGR              | T               | V                                  | 95.00%           | 1.74             | 0                      | 1.85          | 918.56              | 1               | 917.55                    | 0.059                                      | 183                 | 191                |
| TL8              | LITGDAGR              | T               | V                                  | 95.00%           | 2.51             | 0                      | 2.72          | 460.2               | 2               | 918.39                    | 0.9                                        | 183                 | 191                |
| TL8              | LITGDAGR              | T               | V                                  | 95.00%           | 2                | 0                      | 3.96          | 460.17              | 2               | 918.33                    | 0.84                                       | 183                 | 191                |
| TL8              | LITGDAGR              | T               | V                                  | 95.00%           | 2.37             | 0                      | 3.48          | 460.11              | 2               | 918.21                    | 0.72                                       | 183                 | 191                |
| TL8              | LITGDAGR              | T               | V                                  | 95.00%           | 2.77             | 0                      | 3.48          | 460.03              | 2               | 918.04                    | 0.55                                       | 183                 | 191                |
| TL8              | LITGDAGR              | T               | V                                  | 95.00%           | 2.27             | 0                      | 3.02          | 459.97              | 2               | 917.92                    | 0.43                                       | 183                 | 191                |
| TL8              | LITGDAGR              | T               | V                                  | 95.00%           | 1.99             | 0                      | 2.47          | 459.92              | 2               | 917.83                    | 0.34                                       | 183                 | 191                |
| TL9              | LHHHHHH               | K               | -                                  | 95.00%           | 2.19             | 0                      | 1.7           | 478.19              | 2               | 954.36                    | 0.91                                       | 202                 | 208                |
| TL9              | LHHHHHH               | K               | -                                  | 95.00%           | 2.43             | 0                      | 2.21          | 478.06              | 2               | 954.1                     | 0.65                                       | 202                 | 208                |
| TL9              | LHHHHHH               | K               | -                                  | 95.00%           | 2.28             | 0                      | 1.57          | 478                 | 2               | 953.98                    | 0.53                                       | 202                 | 208                |
| TL9              | LHHHHHH               | K               | -                                  | 95.00%           | 2.69             | 0                      | 2.28          | 477.99              | 2               | 953.96                    | 0.51                                       | 202                 | 208                |
| TL9              | LHHHHHH               | K               | -                                  | 95.00%           | 2.28             | 0                      | 2.38          | 319.15              | 3               | 954.42                    | 0.97                                       | 202                 | 208                |



**Table SII.** Plasmids and primers used in this study

|                | Description/Sequence <sup>a</sup>                                                                                             | Reference or Source            |
|----------------|-------------------------------------------------------------------------------------------------------------------------------|--------------------------------|
| <b>Plasmid</b> |                                                                                                                               |                                |
| pCR4Blunt-TOPO | cloning vector, Amp <sup>r</sup> , Kan <sup>r</sup>                                                                           | Invitrogen                     |
| pET23b         | <i>E. coli</i> expression vector, Amp <sup>r</sup>                                                                            | Novagen                        |
| pVV16          | <i>Mycobacteria</i> expression vector, Kan <sup>r</sup> , Hyg <sup>r</sup>                                                    | Schulbach <i>et al.</i> (2001) |
| pMRLB60        | <i>rv0432</i> gene fragment lacking signal peptide sequence in pet23b                                                         | This study                     |
| pMRLB61        | Full-length <i>rv0432</i> gene in pVV16                                                                                       | This study                     |
| pMRLB61.1      | Derivative of pMRLB61 encoding Rv0432 Thr <sub>41</sub> to Ala <sub>41</sub> substitution                                     | This study                     |
| pMRLB61.2      | Derivative of pMRLB61 encoding Rv0432 Thr <sub>45</sub> to Ala <sub>45</sub> substitution                                     | This study                     |
| pMRLB61.3      | Derivative of pMRLB61 encoding Rv0432 Thr <sub>46</sub> to Ala <sub>46</sub> substitution                                     | This study                     |
| pMRLB61.4      | Derivative of pMRLB61 encoding Rv0432 Thr <sub>45</sub> Thr <sub>46</sub> to Ala <sub>45</sub> Ala <sub>46</sub> substitution | This study                     |
| pMRLB61.5      | Derivative of pMRLB61 encoding Rv0432 Thr <sub>51</sub> to Ala <sub>51</sub> substitution                                     | This study                     |
| pMRLB61.6      | Derivative of pMRLB61 encoding Rv0432 Thr <sub>131</sub> to Ala <sub>131</sub> substitution                                   | This study                     |
| pMRLB62        | <i>rv0432</i> gene fragment lacking signal peptide sequence in pVV16                                                          | This study                     |
| <b>Primer</b>  |                                                                                                                               |                                |
| SodC(-SP)F     | <u>5'-CATATGTGCTCGTCGCCGAG</u>                                                                                                | This study                     |
| SodCR1         | <u>5'-CTCGAGGCCGGAACCAATGAC</u>                                                                                               | This study                     |
| SodC(+SP)F     | <u>5'-CATATGCCAAAGCCCGCGAT</u>                                                                                                | This study                     |
| SodCR2         | <u>5'-AAGCTTGCCGGAACCAATGAC</u>                                                                                               | This study                     |
| SodCT41AF      | 5'-GCCGCAGCACGCGT <b>TCG</b> CCGTTCCGGGTACCCACGCC                                                                             | This study                     |
| SodCT41AR      | 5'-GGCGTGTACCCGGA <b>AGGG</b> CAGACGCGTGCTGCGGC                                                                               | This study                     |
| SodCT45AF      | 5'-CTACAGTTCGGGT <b>GGC</b> ACGCCGTCGATTTGGACC                                                                                | This study                     |
| SodCT45AR      | 5'-GGTCAAATCGACGGCG <b>TGG</b> CACCCGGA <b>ACT</b> GTAG                                                                       | This study                     |
| SodCT46AF      | 5'-CTACAGTTCGGGTACCG <b>CGC</b> CGTCGATTTGGACC                                                                                | This study                     |
| SodCT46AR      | 5'-GGTCAAATCGAC <b>GGC</b> CGGTACCCGGA <b>ACT</b> GTAG                                                                        | This study                     |
| SodCTTAAF      | 5'-CTACAGTTCGGGT <b>GGC</b> CGCGCCGTCGATTTGGACC                                                                               | This study                     |
| SodCTTAAR      | 5'-GGTCAAATCGAC <b>GGC</b> CGCGCCGGA <b>ACT</b> GTAG                                                                          | This study                     |
| SodCT51AF      | 5'-GCCGTCGATTTGG <b>CCG</b> GATCGCCCGCGCC                                                                                     | This study                     |
| SodCT51AR      | 5'-GGCGGGCGGAT <b>CCGG</b> CCCAAATCGACGGC                                                                                     | This study                     |
| SodCT131AF     | 5'-CAACTCGGTTGCC <b>CCG</b> CCGGCGGTGCGCC                                                                                     | This study                     |
| SodCT131AR     | 5'-GGCGCACCG <b>CGG</b> CGGGGGCAACCGAGTTG                                                                                     | This study                     |

a. Restriction endonuclease sites are underlined, site-directed mutations are shown in bold
